# Supplementary material for: Health conditions and occupational risks in a novel group: waste pickers in the largest open garbage dump in Latin America
Source: Springer Nature journal article supplement (doi:10.1186/s12889-019-6879-x), 2019-05-16

# Water, the Environment and Health: impact on the living conditions of waste pickers

## HEALTH QUESTIONNAIRE

**\* Mandatory Field**

**Important:** Please do not include any personal or private information in the fields marked "Visible to the Public".

[Click here if you have any questions about this form.](#)

### I. QUESTIONNAIRE IDENTIFICATION INFORMATION

1. Time interview started:
2. Time interview ended:
3. Interviewer's name:
4. Date:
5. Typed by:
6. Date typed:

### II. PARTICIPANT'S PERSONAL DETAILS I am going to ask some questions about you

7. What is your full name (participant)? :

7.1 Federal District Public Health Card (SES/DF) No.:

7.2 Do you belong to a family healthcare team?

Yes

No

7.2.1 If yes, which one(s)?

01

02

03

04

05

06

07

08

09

10

8. What is your date of birth?

9. What state were you born in?

10. Gender:

0.Male

1.Female

11. How old are you? (full years):

12. Your skin color is... (Read the alternatives) :

1.White

2.Black

3. Pardo
- 4.Asian
- 5.Indigenous

**13. What is your address (Street, Neighborhood, Municipality)? :**

**14. Phone number (with area code):**

Contact number for the head of the cooperative.

**15. Landline:**

**16. Cell phone:**

**17. What is your marital status?**

- 1.Single
- 2.Married
- 3.Divorced/Separated
- 4.Common-law marriage

**18. How many children do you have?**

**19. How old are they?**

**20. Do any of them have a deformity / disability? (If the answer is no, go to question 23).**

- 0.No
- 1.Yes

**21. How many?**

**22. What kind of disability? :**

**23. If the participant is a man: has your wife/partner ever had a miscarriage? (If the answer is no, go to question 25).**

- 0.No
- 1.Yes

**24. If the answer is yes, how many? :**

**III – HOUSEHOLD INFORMATION Now I am going to ask some questions about your home:**

**25. What type of water supply do you have at home? (Read the alternatives):**

1. Public water supply network
- 2.Well or spring on the property
- 3.Well or spring outside of the property
- 4.Tanker truck
- 5.Rainwater stored in a cistern
- 6.Rainwater stored some other way
- 7.Rivers, lakes and streams.

**26. The drinking water in your home is:**

- 1.Filtered
- 2.Boiled
- 3.Tap water
- 4.Treated in some other way at home
- 5.Well water

**27. Is your home connected to the sewer system?**

- 0.No
- 1.Yes

**28. How is your water stored?**

1. Open cistern
2. Closed cistern
3. Open water tank
4. Closed water tank
5. Other

**29. Of other, please specify:****IV – LIFESTYLE HABITS Now I am going to ask a little about your habits and things you usually do****30. Do you smoke?**

(If the answer is no, go to question 35).

- 0.No
- 1.Yes

**31. Do you smoke every day? :**

- 0.No
- 1.Yes

**32. How many cigarettes do you smoke a day? :** (One pack contains 20 cigarettes)

1. > 20
2. 10 to 20
3. 5 to 10
4. < 5

**33. How long have you been a smoker?****34. How long has it been since you quit smoking?****35. Do you drink hard alcohol, beer or any other type of alcohol?**

If the participant does not drink alcohol or does not know, go to question 37

0. No (confirm: "not even every now and then?")
1. Yes
2. Don't know
3. Occasionally

**35.1 – How much do you drink?****36. How often do you drink alcohol?**

1. Once a week
2. Twice a week
3. Three times a week
4. Every day

**37. Do you use illegal drugs (psychotropics)?**

- 0.NO
- 1.YES

**38. Have you ever used illegal drugs (psychotropics)?**

(If the answer is no, go to question 48).

- 0.NO
- 1.YES

**39. Which one(s)? :**

1. LSD
2. Marijuana
3. Crack
4. Cocaine
5. Other

**40. If "other", Please specify:**

**41. Have you ever been treated for drug addiction?**

- 0. NO
- 1. YES

**42. Which drug(s)? :**

**43. Are you currently using medication as a result of drug addiction?**

- 0. NO
- 1. YES

**44. Please specify:**

**45. Have you ever had psychological or psychiatric treatment** (If the answer is no, go to question 47).

- 0. NO
- 1. YES

**46. How long ago?**

**47. For how long?**

**48. Do you engage in physical activity for at least 30 minutes at a time in your free time? :**  
(for example: running, cycling, playing football)

- 0. NO
- 1. YES

**49. How many days a week do you engage in physical activity?**

No. of days

- 1. One to two
- 2. Three to four
- 3. Five or more

#### **V – EATING HABITS Now I am going to ask about your eating habits**

**50. How many meals do you eat a day?**

- 1. Breakfast
- 2. Mid-morning snack
- 3. Lunch
- 4. Afternoon snack
- 5. Dinner
- 6. Evening snack

**51. Yesterday you ate (read the options):**

**51.1. Beans:**

- 0. NO
- 1. YES

**51.2. Rice:**

- 0. NO
- 1. YES

**51.3. Meat (beef, pork, chicken, fish and others) and eggs:**

- 0. NO
- 1. YES

**51.4. Fresh fruit (not fruit juice):**

- 0. NO
- 1. YES

**51.5. Vegetables (not potato, cassava or yams):**

- 0. NO
- 1. YES

**51.6. Hamburger and/or cured meats (ham, mortadella, salami, sausage):**

- 0. NO
- 1. YES

**51.7. Artificially Sweetened drinks (soda, juice box, powdered drink mix, boxed coconut water, , guaraná/redcurrant concentrate, sweetened fruit juice):**

- 0. NO
- 1. YES

**51.8. Instant noodles, savory snacks or salt crackers:**

- 0. NO
- 1. YES

**51.9. Junk food as cookie or candy (hard candy, lollipop, bubblegum, caramel candy, jello candy:**

- 0. NO
- 1. YES

**VI – WORK-RELATED INFORMATION Now I am going to ask about your work****52. Are you or have you ever been a waste picker?**

(If the answer is no, go to question 101).

- 0. NO
- 1. YES

**53. At what age did you start working as a waste picker?****54. How long have you worked as a waste picker?****55. If you are no longer a waste picker, how long ago did you stop?****56. Are you a member of a waste pickers` cooperative?**

- 0. NO
- 1. YES

**57. Which one?****58. Where do you work?**

- 1. Open dumps
- 2. Sorting plants
- 3. On the street

**59. How do you work? :**

- 1. Bags
- 2. Conveyor belt
- 3. Compactor
- 4. Other

**60. If other, please specify:****61. How many hours a week do you work? :****62. What time of day?**

- 1. Daytime
- 2. Nighttime
- 3. Both

**63. In general, how many hours a day do you work? :**

1. Less than 5 hours
2. 5 to 8 hours
3. More than 8 hours

**64. In the last week has anyone from your family helped or accompanied you waste picking?**

0. NO
1. YES

**65. Who?**

1. Wife
2. Child
3. Husband
4. Father/Mother
5. Grandchild(ren)
6. Brother(s) / Sister(s)
7. Other

**66. If other, please specify:****67. When working, are you exposed to sharp objects such as tin cans, nails and glass?**

0. NO
1. YES

**68. Are you at risk of being run over when working?**

0. NO
1. YES

**69. When working, do you use equipment that is worn or broken (e.g.: rusty knife, torn gloves, the same clothes several days in a row)?**

0. NO
1. YES

**70. What type of personal protective equipment (PPE) do you wear at work? :**

1. Hat / cap
2. Raincoat
3. Gloves
4. Boots
5. Mask
6. Long-sleeved shirt

**71. Does your work put you at risk of accidents?**

0. NO
1. YES

**72. Do you think your work is dangerous?**

0. NO
1. YES

**73. Do you consider your work exhausting?**

0. NO
1. YES

**74. Have you ever been injured while working?**

0. NO
1. YES

**75. If yes, how many times? :****76. What parts of your body were injured?**

1. Head
2. Arms (except hands)

- 3 Hands
4. Legs (except feet)
5. Feet
6. Chest
7. Several body parts
8. Other

**77. If other, please specify? :**

**78. What type of injury did you sustain?**

1. Cut / puncture
2. bump / contusion
3. wound
4. fracture
5. lost limb / amputation
6. other

**79. If other, please specify:**

**80. Did you seek treatment?**

0. NO
1. YES

**81. If the answer is yes, where did you go?**

1. Healthcare clinic
2. Outpatient clinic
3. Emergency room
4. Hospital
5. Other

**82. If other, please specify:**

**83. Was an Occupational Accident Report filled out?**

0. NO
1. YES

**84. Were you unable to work?**

0. NO
1. YES

**85. If the answer is yes, for how many days?**

**86. Do you pay social security tax (INSS)?**

0. NO
1. YES

**87. If yes, for how long? (in years):**

**88. Did you receive support from the cooperative where you worke(d) after your accident?**

0. NO
1. YES

**89. Did your injury make household chores or other everyday tasks difficult? :**

0. NO
1. YES

**90. Have you been on medical leave in the last 12 months (except maternity leave)?**

0. NO
1. YES

**91. If the answer is yes, what was the reason? :**

**92. How do you collect waste?**

1. Horse and cart
2. Wheelbarrow
3. Bicycle
4. On foot
5. Other

**93. If other, please specify:****94. What type of material do you collect?**

1. Paper/cardboard
2. Plastic
3. Iron
4. Electronic waste
5. Aluminum
6. Glass
7. Copper
8. Styrofoam
9. Other

**95. of other, please specify:****96. Do you come into contact with decomposing (rotting) garbage?**

0. NO
1. YES

**97. When working, do you come into contact with any of the following animals? :**

1. Dogs
2. Cats
3. Birds
4. Horses
5. Poisonous animals (spiders, scorpions)
6. Rodents (rats, guinea pigs)
7. Reptiles (snakes, lizards)
8. Organic material (disposable diapers, toilet paper)
9. Hospital waste (gauze, disposable syringes, needles)

**98. In the last month, have you come into contact with:**

1. Smoke
2. Batteries
3. Oil
4. Grease
5. Insecticides
6. Solvents
7. Paint
8. Cleaning products
9. Medicine
10. Aerosols
11. Other toxic products

**99. If other, please specify:****100. When working, do you handle containers used for chemical products (e.g.: bleach, ajax, chemical disinfectants, caustic soda, acid)?**

0. NO
1. YES



**VIII – BIOMETRIC INFORMATION** Now I am going to ask about your weight and height

**101. How much do you currently weigh? :**

**102. What is your height?**  
in cm

**IX – HEALTH STATUS** Now I am going to ask about your health and any diseases you may have had

CHRONIC DISEASES Now I am going to ask about other health problems

**103. When was the last time you had your blood pressure taken? :**

1. Less than 6 months ago
2. 6 months to 1 year ago
3. 1 to 2 years ago
4. 2 to 3 years ago
5. 3 years ago or more
6. Never

**104. Has a doctor ever diagnosed you with high blood pressure?** (If the answer is no, go to question 107)

0. NO
1. YES

**105. How old were you when you were first diagnosed with high blood pressure?**

**106. When was the last time you received medical treatment for high blood pressure? :**

1. Less than 6 months ago
2. 6 months to 1 year ago
3. 1 to 2 years ago
4. 2 to 3 years ago
5. 3 years ago or more
6. Never

**107. When was the last time you had a blood test to measure your blood sugar level?**

1. Less than 6 months ago
2. 6 months to 1 year ago
3. 1 to 2 years ago
4. 2 to 3 years ago
5. 3 years ago or more
6. Never

**108. Has a doctor ever diagnosed you with diabetes or high blood sugar?** (If the answer is no, got to question 111)

0. NO
1. YES

**109. How old were you when you were first diagnosed with diabetes?**

**110. When was the last time you received medical treatment for diabetes? :**

1. Less than 6 months ago
2. 6 months to 1 year ago
3. 1 to 2 years ago
4. 2 to 3 years ago
5. 3 years ago or more
6. Never

**111. When was the last time you had a blood test to measure your cholesterol and triglyceride levels? :**

1. Less than 6 months ago
2. 6 months to 1 year ago
3. 1 to 2 years ago
4. 2 to 3 years ago
5. 3 years ago or more
6. Never

**112. Has a doctor ever diagnosed you with high cholesterol?**

(If the answer is no, go to question 114)

0. NO
1. YES

**113. How old were you when you were first diagnosed with high cholesterol?**

**114. Has a doctor ever diagnosed you having a stroke?**

(If the answer is no, go to question 116)

0. NO
1. YES

**115. How old were you when you were first diagnosed having a stroke?**

**116. Has a doctor ever diagnosed you with chronic kidney disease?**

(If the answer is no, go to question 117)

0. NO
1. YES

**117. How old were you when you were first diagnosed with chronic kidney disease?**

**X – ENVIRONMENTAL HEALTH PROBLEMS Now I am going to ask some questions about your intestinal health**

**118. Have you had intestinal worms in the last month?**

0. NO
1. YES

**119. How do you know? :**

1. Worms observed after evacuation
2. Stool test
3. Medical diagnosis
4. Other

**120. Have you ever had leptospirosis?**

(If the answer is no, go to question 123).

0. NO
1. YES

**121. How long ago? :**

**122. How do you know?**

1. Diagnosed by a doctor
2. Medical tests
3. Other

**123. Have you had diarrhea in the last month?**

0. NO
1. YES

**124. When did it start?**

**125. Do you still have it?**

0. NO
1. YES

**126. Have you ever had dengue fever, Zika virus or chikungunha?**

0. NO
1. YES

**127. If yes, which one? :**

1. Dengue fever
2. Zika virus
3. Chikungunha

**128. Did you experience any related complications? :**

**129. Has a doctor ever diagnosed you with hepatitis A?**

0. NO
1. YES

**XI – MUSCULOSKELETAL PROBLEMS Now I am going to ask some questions about your physical health**

**130. In the last year, have you experienced any pain or discomfort in any of the following:**

1. Neck
2. Shoulders
3. Elbows
4. Wrists or hands
5. Upper back
6. Lower back
7. Thighs
8. Legs
9. Knees
10. Ankles
11. Arms

**131. Has this ever prevented you from doing household chores or other everyday tasks in the last year?**

- 0. NO
- 1. YES

**132. Have you experienced this pain in the last 7 days?**

- 0. NO
- 1. YES

**133. Has a doctor ever diagnosed you with arthritis or rheumatism?**

- 0. NO
- 1. YES

**134. Have you ever had any chronic spinal problems such as chronic back or neck pain, lower back pain, sciatica or spinal disk problems?**

- 0. NO
- 1. YES

**135. How old were you when you started experiencing back pain?**

### **SKIN PROBLEMS** Now I am going to ask you questions about your skin

**136. Have you experienced any of the following in the last year:**

- 1. Itching and rash
- 2. Sores with pus
- 3. Blisters
- 4. Calluses
- 5. Nail problems
- 6. Lice
- 7. Scabies
- 8. Sand flea bites
- 9. Myiasis, human botfly infection
- 10. Shingles
- 11. Marks on the skin accompanied by numbness

**137. Others (please specify):**

### **XIII – CARDIORESPIRATORY PROBLEMS** Now I am going to ask some questions about your heart and lungs

**138. Has a doctor ever diagnosed you with heart disease?**

- 0. NO
- 1. YES

**139. Which one(s)?**

- 1. Heart attack
- 2. Heart failure
- 3. Angina

**140. How old were you when you were first diagnosed with heart disease?**

**141. If you have been diagnosed with a different type of heart disease, please specify:**

**142. Has a doctor ever diagnosed you with bronchitis?**

- 0. NO
- 1. YES

**143. Has a doctor ever diagnosed you with asthma?**

- 0. NO
- 1. YES

**144. Have you had an asthma attack in the last 12 months?**

- 0. NO
- 1. YES

**145. Do you have or have you ever had any other type of lung problem?**

(If the answer is no, go to question 148)

- 0. NO
- 1. YES

**146. Please specify**

**147. How old were you when you were first diagnosed with a lung disease?**

**148. Has a doctor ever diagnosed you with tuberculosis?**

- 0. NO
- 1. YES

**149. Did you receive treatment?**

- 0. NO
- 1. YES

**150. Did you complete the treatment?**

- 0. NO
- 1. YES

**151. Have you had pneumonia in the last year?**

(If the answer is no, go to question 156).

- 0. NO
- 1. YES

**152. How many times? :**

**153. The last time you had it, who told you it was pneumonia? :**

- 1. Doctor
- 2. Nurse
- 3. Pharmacist
- 4. Other

**154. Did you receive treatment? :**

- 0. NO
- 1. YES

**155. Where? :**

- 1. Home
- 2. Hospital
- 3. Healthcare Center
- 4. Outpatient Center
- 5. Pharmacy

**XIV - CANCER Now I am going to ask you some questions about cancer**

**156. Have you ever been diagnosed with cancer?**

(If the answer is no, go to question 162).

- 0. NO
- 1. YES

**157. When first diagnosed, what type of cancer did you have?**

- 1. Lung
- 2. Intestine
- 3. Stomach
- 4. Breast
- 5. Cervix (women only)

6. Prostate (men only)
7. Skin
8. Mouth
9. Other (specify) \_\_\_\_\_

**157.1 – If other, please specify:**

**158. How old were you when you were first diagnosed with cancer?**

**159. In general, to what extent did the cancer or related problems limit your everyday activities (such as working, doing household chores, etc.)?**

1. Not at all
2. A little
3. Some
4. Quite a lot
5. A lot

**160. Did you receive treatment?**

0. NO
1. YES

**161. Where?**

1. Hospital
2. Outpatient care

**162. What type of treatment?**

1. Surgery
2. Chemotherapy
3. Radiotherapy

#### **XV - MENTAL HEALTH Now I am going to ask some questions about your mental health**

**163. Do you often experience headaches?**

0. NO
1. YES

**164. Do you suffer from a lack of appetite?**

0. NO
1. YES

**165. Do you sleep poorly?**

0. NO
1. YES

**166. Do you get easily frightened?**

0. NO
1. YES

**167. Do you have hand tremors?**

0. NO
1. YES

**168. Do you feel nervous, tense or worried?**

0. NO
- 1 YES

**169. Do you have poor digestion?**

0. NO
1. YES

**171. Have you been feeling sad lately?**

0. NO

1. YES

**172. Have you been crying more than usual?**

0. NO

1. YES

**173. Do you get enjoyment from everyday activities?**

0. NO

1. YES

**174. Do you find it difficult to make decisions?**

0. NO

1. YES

**175. Do you feel your work is strenuous and causes you suffering?**

0. NO

1. YES

**176. Do you think your work plays an important role in your life?**

0. NO

1. YES

**177. Have you lost interest in things?**

0. NO

1. YES

**178. Do you feel worthless?**

0. NO

1. YES

**179. Have you ever thought about committing suicide?**

0. NO

1. YES

**180. Do you feel tired all the time?**

0. NO

1. YES

**181. Has a mental health professional (such as a psychiatrist or psychologist) ever diagnosed you with depression?**

(If the answer is no, go to question 183).

0. NO

1. YES

**182. How old were you when you were first diagnosed with depression?**

**183. Has a mental health professional (such as a psychiatrist or psychologist) ever diagnosed you with another type of mental disorder, such as schizophrenia, bipolar disorder, psychosis or obsessive compulsive disorder (OCD)?**

(If the answer is no, go to question 187).

**184. If yes, which one?**

1. Schizophrenia

2. Bipolar disorder

3. OCD (Obsessive Compulsive Disorder)

4. Other

**185. If other, please specify:**

**186. How old were you when you were first diagnosed with a mental disorder?**

## **XVI – SEXUALLY TRANSMITTED DISEASES**

**187. Have you ever had hepatitis?**

- 0. NO
- 1. YES

**188. What type?**

- 1. A
- 2. B
- 3. C
- 9. Don't know

**189. Did you receive treatment?**

- 0. NO
- 1. YES

**190. Did you complete the treatment?**

- 0. NO
- 1. YES

**191. Have you ever had any other sexually transmitted diseases (STDs)?**

- 0. NO
- 1. YES

**192. If yes, please specify:****XVII - USE OF MEDICINES Now I am going to ask some questions about your use of medicines****193. Do you use any continuous medication? (Every day) :**

(If the answer is no, go to question 196).

- 0. NO
- 1. YES

**194. What problems do you use this medication for? :**

- 1. High blood pressure
- 2. Angina? Chest pain or discomfort?
- 3. Diabetes or high blood sugar
- 4. Asthma
- 5. Hepatitis
- 6. Aids
- 7. High cholesterol or triglycerides
- 8. Birth control
- 9. Insomnia
- 10. Depression
- 11. Arthritis/arthrosis
- 12. Pain

**194.1 Others (Specify):****195. Are you able to obtain all the medication you need? (either by buying or receiving free from health clinics)**

- 0. NO
- 1. YES

**196. Have you ever found medication in the trash?**

- 0. NO
- 1. YES

**197. Have you ever used medication you found in garbage?**

- 0. NO
- 1. YES

**198. Do you know anyone who has used medication found in garbage? :**

- 0. NO
- 1. YES



**XVIII – WOMEN’S HEALTH** Now I am going to ask about your reproductive history.

**199. Have you ever been pregnant? (Even if you never carried to term)?**

- 0. NO
- 1. YES

**200. How old were you at your first pregnancy?**

**201. How many times have you given birth?**

**202. How many of these were cesarean sections?**

**203. How many resulted in live births (that is, infants who showed signs of life at birth)?**

**204. Did any of your live born children subsequently die?**

- 0. NO
- 1. YES

**205. If yes, what was the cause? :**

**206. Have you ever suffered a miscarriage?**

- 0. NO
- 1. YES

**207. How many?**

**208. Have you ever had an abortion?**

- 0. NO
- 1. YES

**209. If yes, how many?**

**210. How many of your children were born with a health problem, disability or some type of malformation?**

**211. Blood pressure:**

**212. Remarks:**

**213. Have you ever had a Pap smear?**

- NO
- YES

**214. When was the last time you had a Pap smear? :**

- 1. Less than 1 year ago
- 2. 1 to 2 years ago
- 3. 2 to 3 years ago
- 4. 3 or more years ago

**XIX – ADDITIONAL SOCIOECONOMIC INFORMATION** Now I am going to ask some questions about your schooling level

**215. Can you read and write?**

- 0. NO
- 1. YES

**216. What was the highest level of schooling you completed?**

- 0. None
- 1. Primary education (Elementary School)
- 2. Secondary education (High School)
- 3. Higher education (College)

**217. What was the last grade you passed at school?**

**218. Is working as a waste picker your only source of income? :**

- 0. NO
- 1. YES

**219. Do you do other work to supplement your income as a waste picker? :**

- 0. NO
- 1. YES

**220. How much do you earn a month?**

**221. Do you receive:**

- 1. A pension
- 2. Alimony/Child Support
- 3. Any other financial aid

**221 - A – IF YOU RECEIVE OTHER FINACIAL AID, PLEASE SPECIFY**

**222. What is your monthly household income?**

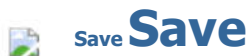

**Important:** When saving, please wait for the confirmation screen. Your data will only be saved when the confirmation screen appears.

[Click here if you have any questions about this form.](#)

**Page 1 of 1**

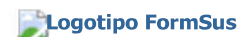

Supplement: MOESM1 [file 16729162]
